# Supplementary material for: Synaptosome microRNAs regulate synapse functions in Alzheimer’s disease
Source: PubMed Central journal article supplement (PMC9359989; doi:10.1038/s41525-022-00319-8), 2022-08-08
Supplement: 41525_2022_319_MOESM2_ESM.pdf [file 41525_2022_319_MOESM2_ESM.pdf]

## Supplementary Information

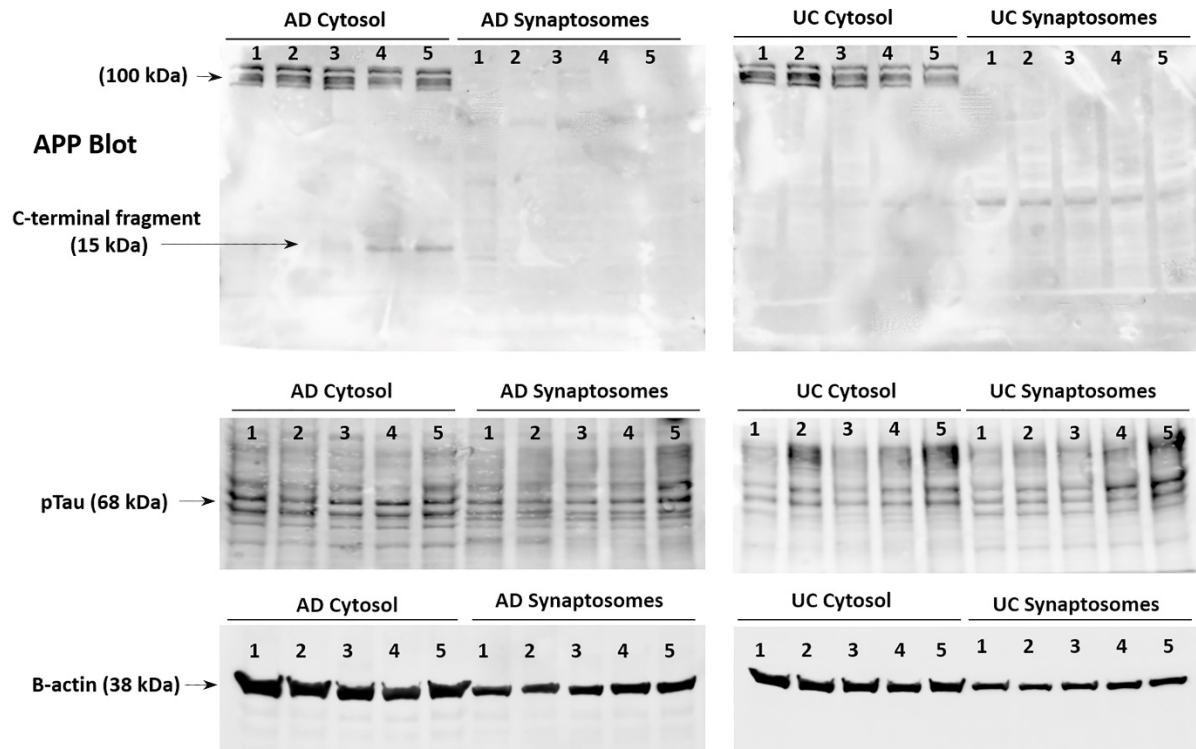

**Supplementary Figure 1.** Immunoblotting of APP and p-tau proteins in cytosol and synaptosome in AD and unaffected controls. All blots are driven from the same experiment and were proceed parallelly.

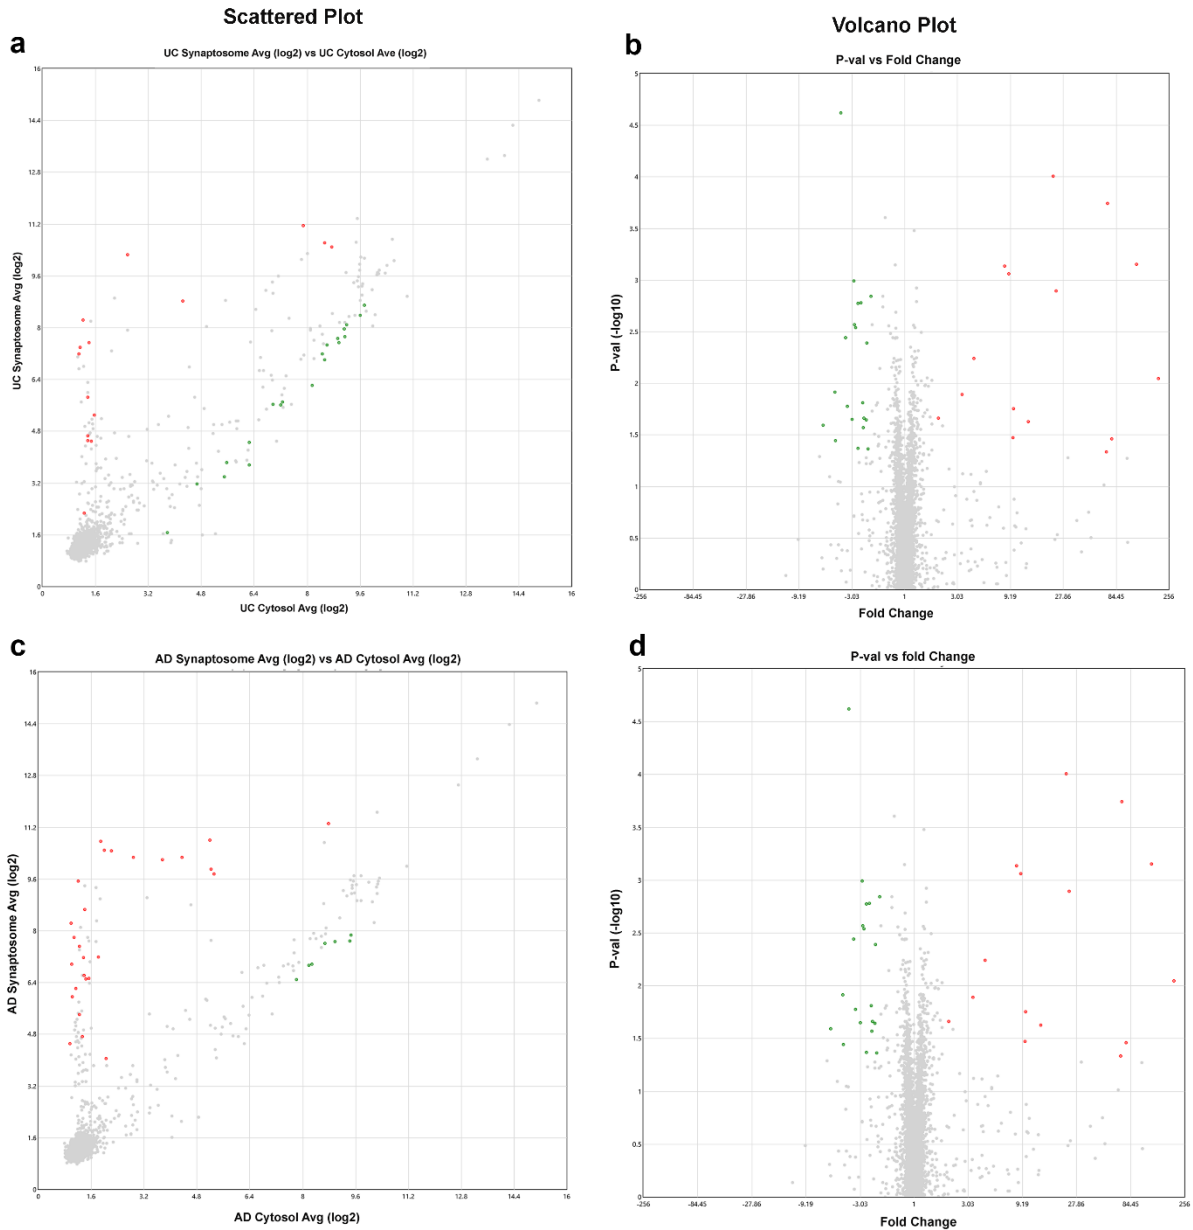

**Supplementary Figure 2.** (a) Scattered plot showing the average log<sub>2</sub> fold changes values of significantly deregulated miRNAs in cytosol and synaptosome in healthy state. (b) Volcano plot showing the p values (-log<sub>10</sub>) of significantly deregulated miRNAs in cytosol and synaptosome in healthy state. (c) Scattered plot showing the average log<sub>2</sub> fold changes values of significantly deregulated miRNAs in cytosol and synaptosome in AD state. (d) Volcano plot showing the p values (-log<sub>10</sub>) of significantly deregulated miRNAs in cytosol and synaptosome in AD state.

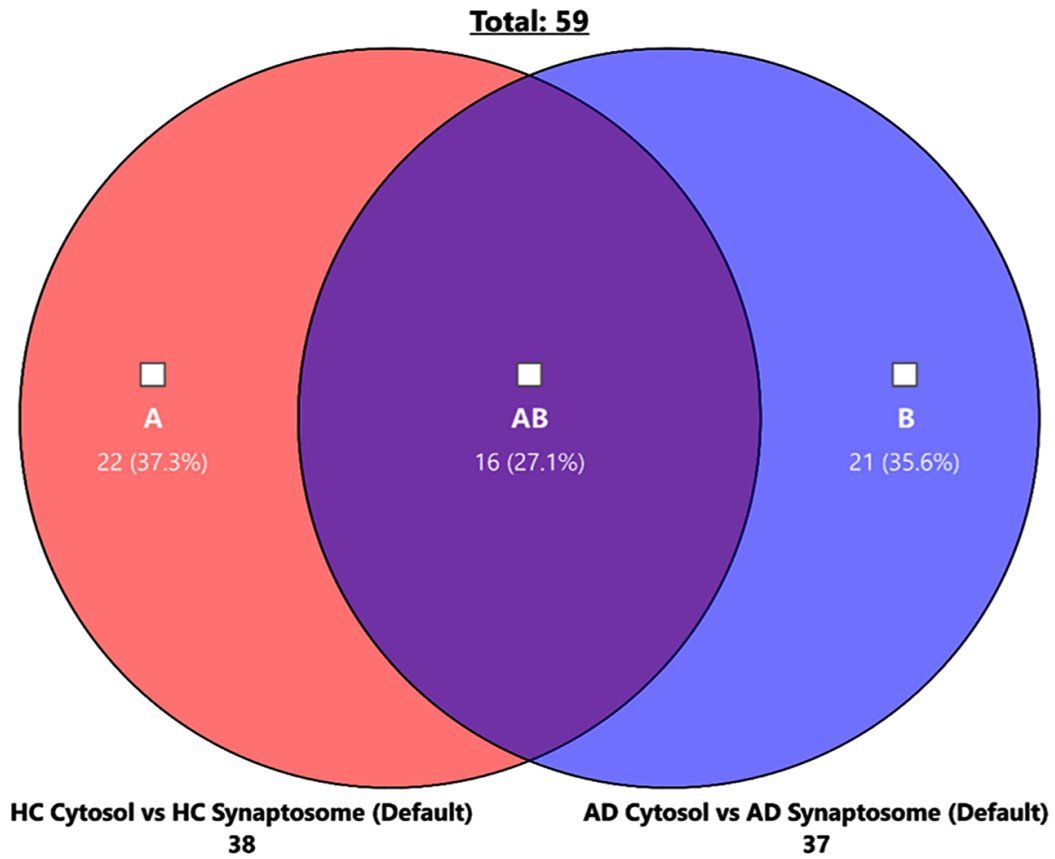

**Supplementary Figure 3.** Venn diagram showing the number of miRNAs that expressed only in cytosol and synptosome in AD vs healthy state.

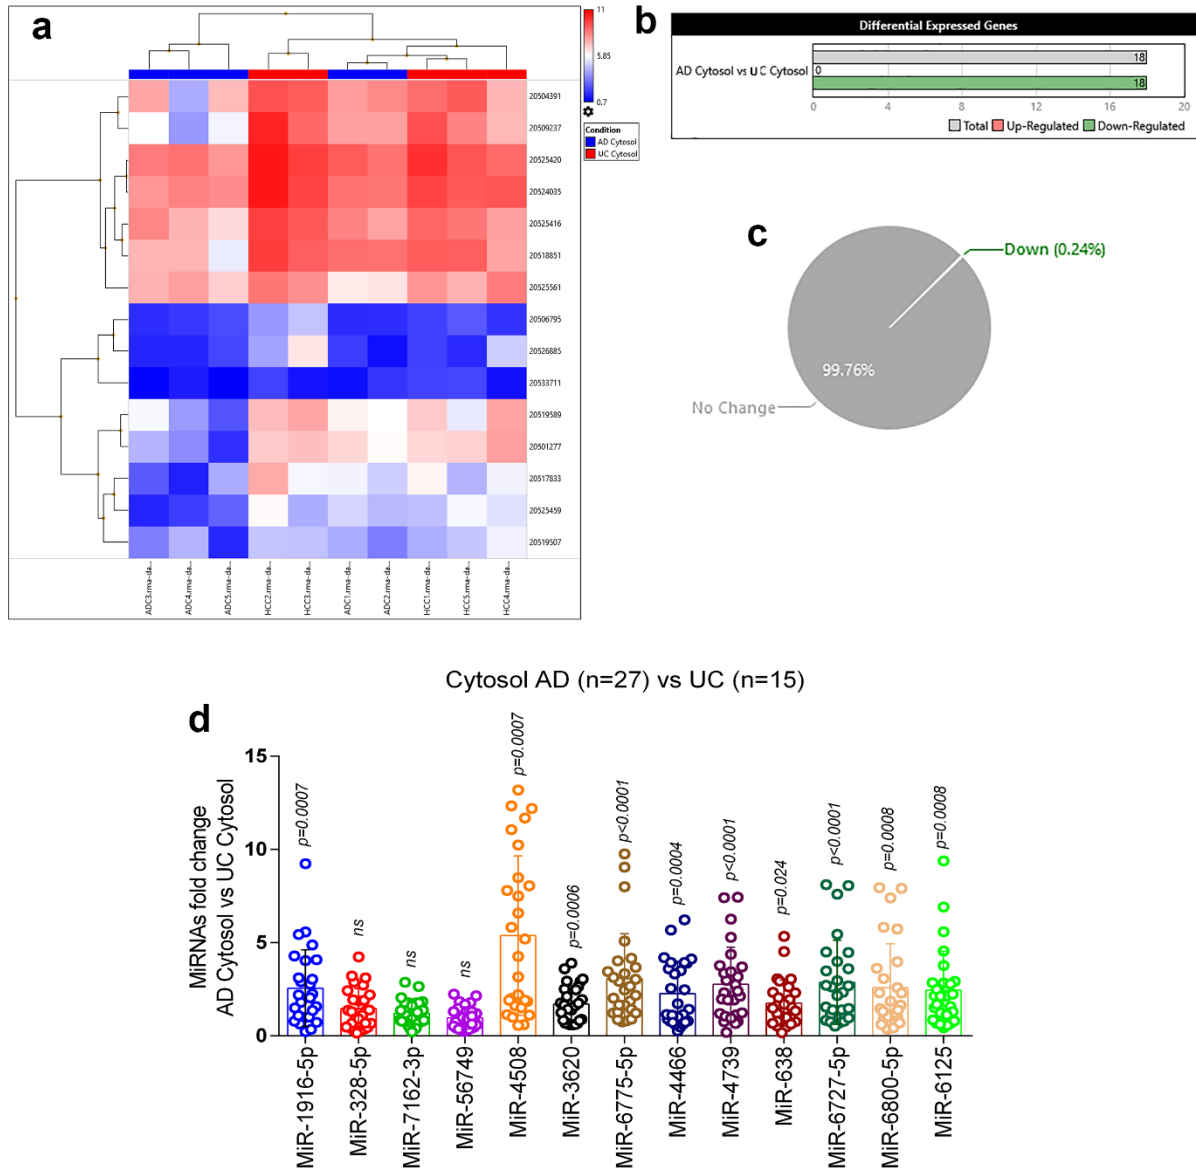

**Supplementary Figure 4.** (a) Hierarchical clustering and heat map of significantly deregulated miRNAs in AD cytosol and unaffected control cytosol. (b) Total number of miRNAs deregulated in cytosol in AD vs unaffected controls. (c) Percentage of miRNAs population changed in the cytosol in AD vs UC. (d) qRT-PCR based validation analysis of significantly deregulated miRNAs in unaffected control (n=15) and AD (n=27) cytosol. MiRNAs expression was quantified in AD vs UC cytosol. Values in the bar diagrams are mean  $\pm$  SEM and error bars are equivalent throughout the figure (d).

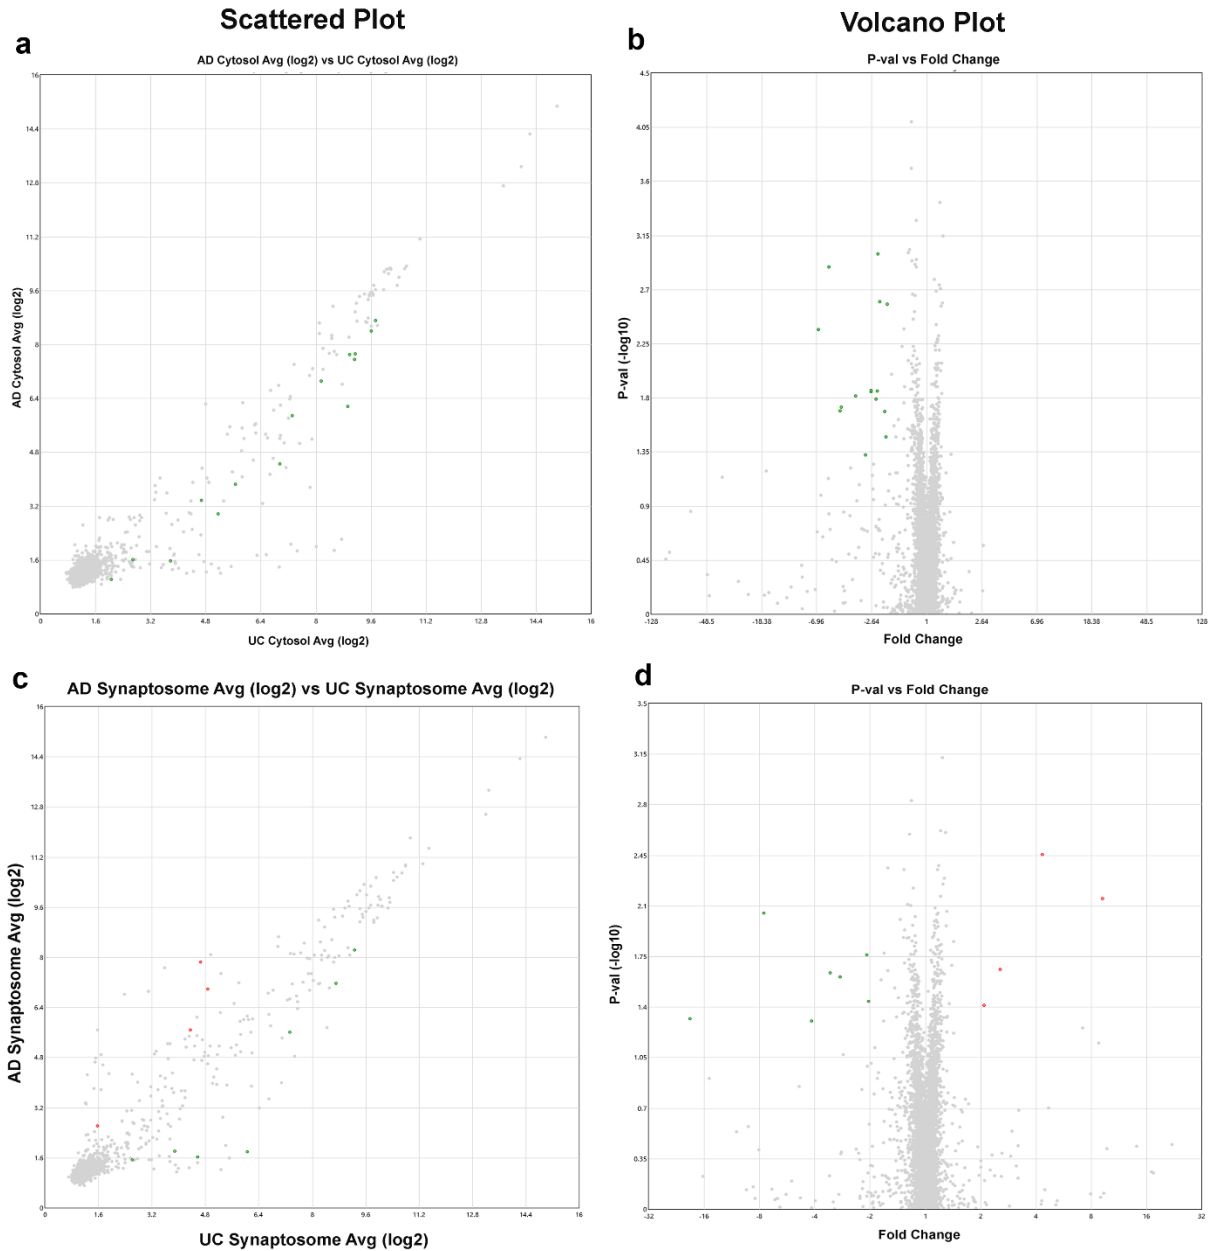

**Supplementary Figure 5.** (a) Scattered plot showing the average log<sub>2</sub> fold changes values of significantly deregulated miRNAs in the cytosol in AD vs healthy state. (b) Volcano plot showing the p values (-log<sub>10</sub>) of significantly deregulated miRNAs in cytosol in AD vs healthy state. (c) Scattered plot showing the average log<sub>2</sub> fold changes values of significantly deregulated miRNAs in the synaptosome in AD vs healthy state. (d) Volcano plot showing the p values (-log<sub>10</sub>) of significantly deregulated miRNAs in synaptosome in AD vs healthy state.

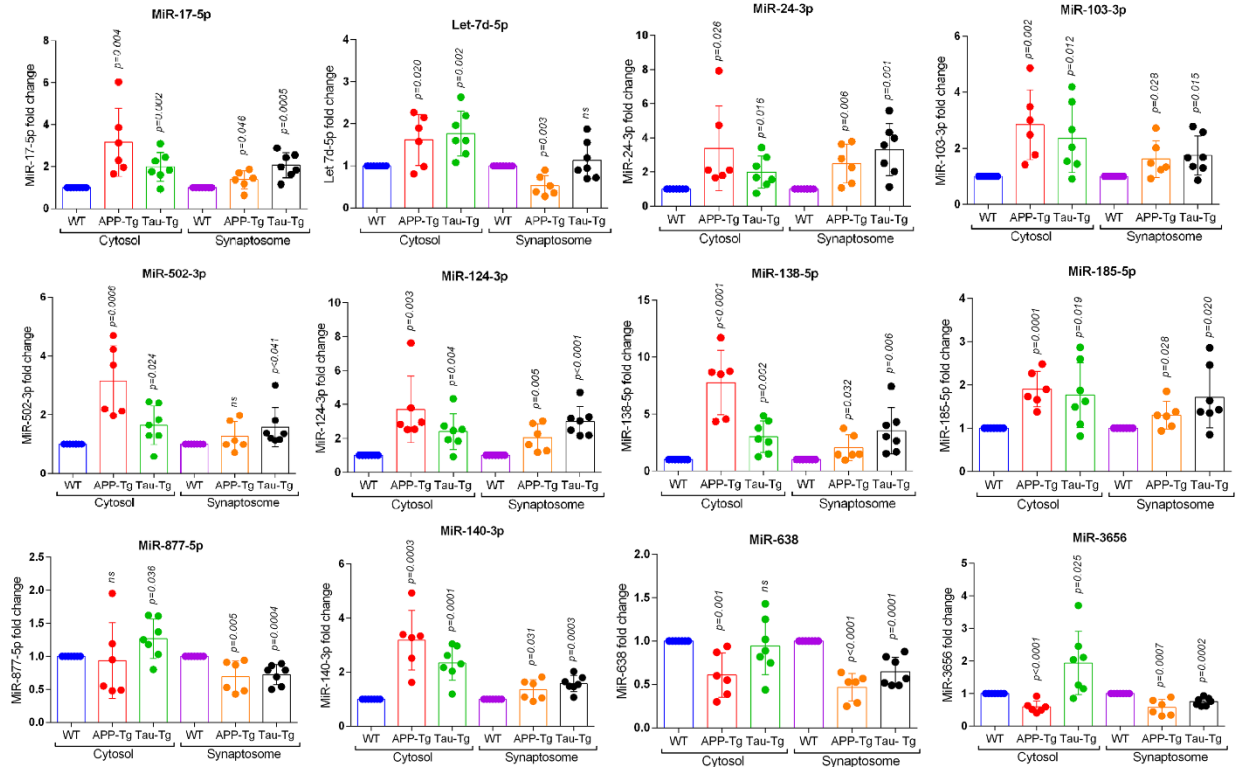

**Supplementary Figure 6.** Validation analysis of significantly deregulated cytosol miRNAs in WT mice (n=7), APP Tg mice (n=6) and Tau Tg mice (n=7). MiRNAs expression was quantified in WT vs APP Tg and Tau Tg mice in both cytosol and synaptosome. Values in the bar diagrams are mean  $\pm$  SEM and error bars are equivalent throughout all the figures.

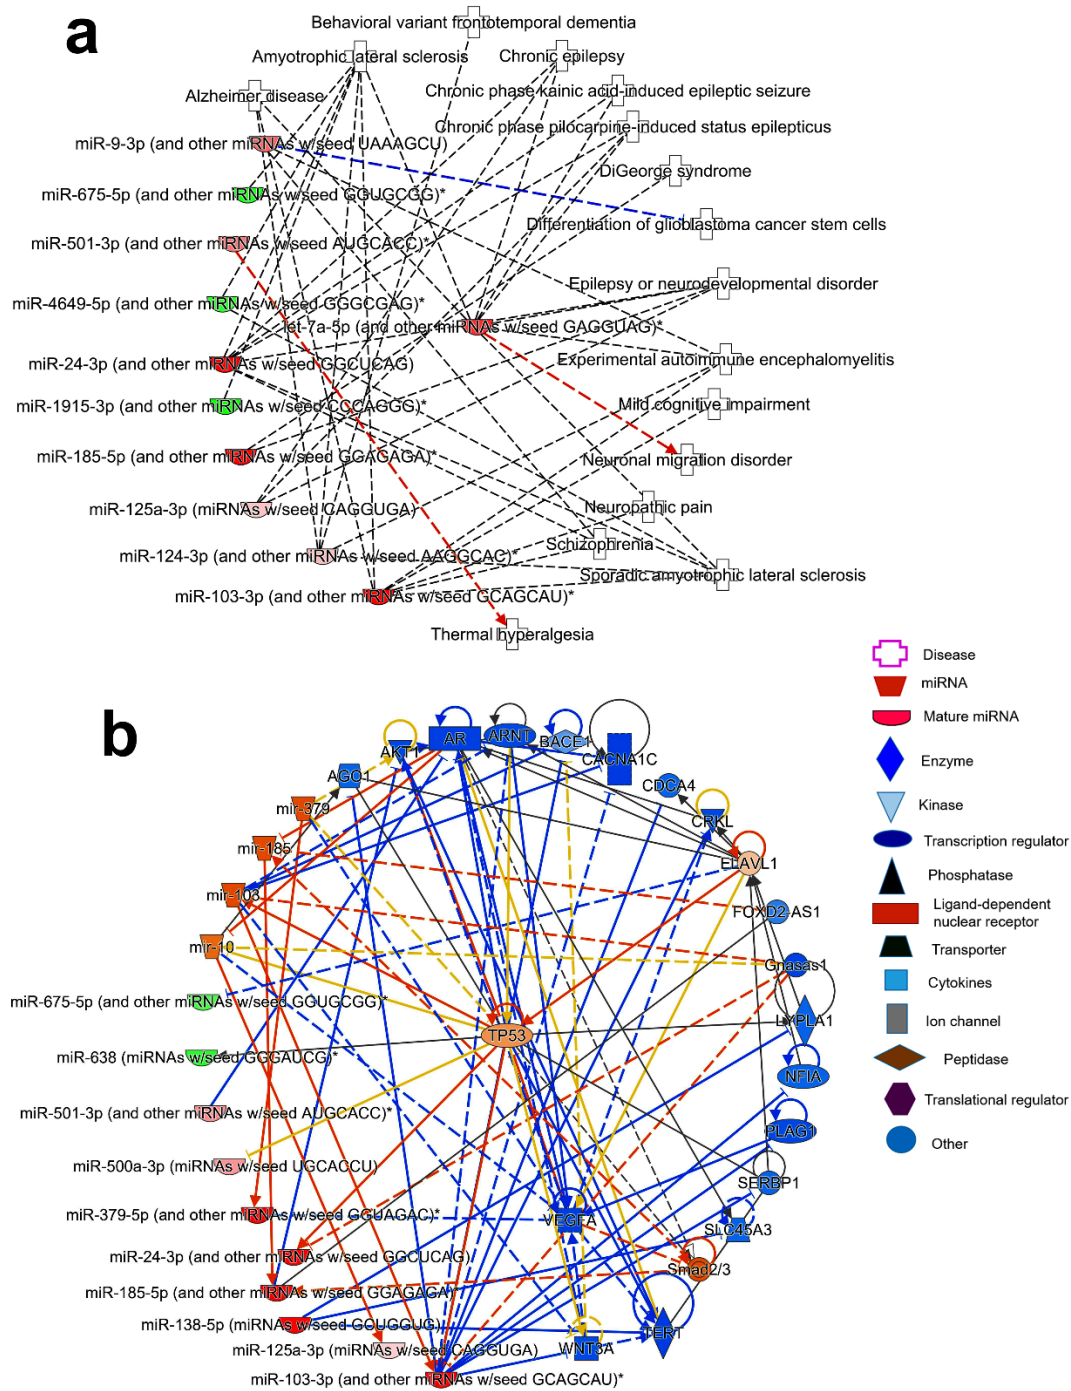

**Supplementary Figure 7.** Ingenuity Pathway Analysis of cytosolic and synaptosome miRNAs in healthy state (a) Healthy state- cytosolic and synaptosome miRNAs expression network in various human diseases. Green nodes represent decreased expression and red nodes represent increased expression of miRNAs. (b) MiRNAs target and seed sequences network of cytosolic and synaptosome miRNAs in the healthy state.

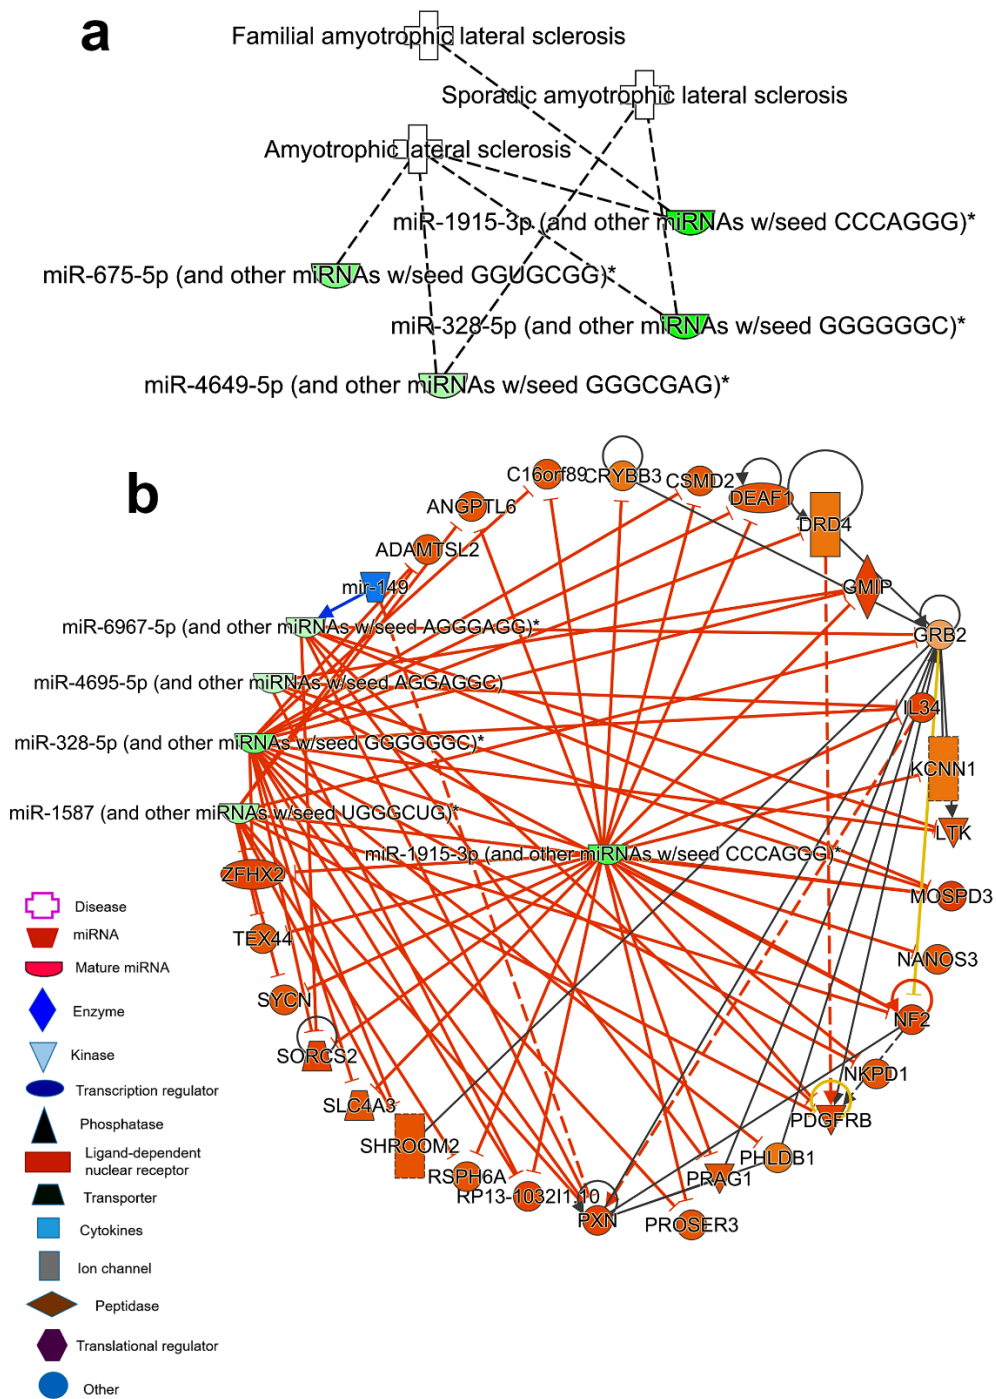

**Supplementary Figure 8.** Ingenuity Pathway Analysis of cytosolic miRNAs (a) Cytosolic miRNAs expression network in various human diseases. (b) Cytosolic miRNAs target and seed sequences network in AD and healthy state.



**Homo sapiens gamma-aminobutyric acid type A receptor subunit alpha1 (GABRA1), transcript variant 1, mRNA**

NCBI Reference Sequence: NM\_000806.5

[GenBank Graphics](#)

>NM\_000806.5 Homo sapiens gamma-aminobutyric acid type A receptor subunit alpha1 (GABRA1), transcript variant 1, mRNA

AACAGAAGATGCCGGAAGGGGGGAAAAGTAGATGCGGATTTTCGTCCTGACTTCTAAAAATTCCTCC  
TCTCCCTCTCCATTTTCTAATCCGAGAATGATGGAGCTCGAGGCAAAGGAATGATTCCGGAAATGGAG  
ATATGATTCTCAAACCTAGAAATGATCGGAGTGATTTATTAGTTAAATATTCTTCGTCCAGGAACCCAGC  
ACAATTCAGAGCTGCAGATTGGATATTGGGAAGCAAATTTGGGTGTGAAATCTTCAGCAAAGGAGCACGC  
AGAGTCCATGATGGCTCAGACCAAGTGAGTGAGAGGCAGAGCGAGGACGCCCTCTGTCTGGCGCGCCC  
GGACTCGGACTCGCAGACTCGCGCTGGCTCCAGTCTCTCCACGATTCTCTCTCCAGACTTTTCCCGGT  
CTTAAGAGATCCTGTGTCCAGAGGGGGCCTTAGCTGCTCCAGCCCGCGATGAGGAAAAGTCCAGGTCTGT  
CTGACTGTCTTTGGGCCTGGATCCTCCTTCTGAGCACACTGACTGGAAGAAGCTATGGACAGCCGTCAAT  
ACAAGATGAACTTAAAGACAATACCACTGTCTTACCAGGATTTTGGACAGACTCCTAGATGGTTATGAC  
AATCGCCTGAGACCAGGATTGGGAGAGCGTGTAACCGAAGTGAAGACTGATATCTTCGTCACCAGTTTCG  
GACCCGTTTCAGACCATGATATGGAATATACAATAGATGTATTTTTCCGTCAAAGCTGGAAGGATGAAAG  
GTTAAAATTTAAAGGACCTATGACAGTCCTCCGGTTAAATAACCTAATGGCAAGTAAAATCTGGACTCCG  
GACACATTTTTCCACAATGGAAAGAAGTCAGTGGCCACAACATGACCATGCCAACAAACTCCTGCGGA  
TCACAGAGGATGGCACCTTGCTGTACACCATGAGGCTGACAGTGAGAGCTGAATGTCCGATGTCATTGGGA  
GGACTTCCCTATGGATGCCCATGCTTGCCCACTAAAATTTGGAAGTTATGCTTATAACAAGAGCAGAAGTT  
GTTTATGAATGGACCAGAGAGCCAGCACGCTCAGTGGTTGTAGCAGAAGATGGATCACGTCTAAACCAGT  
ATGACCTTCTTGACAAACAGTAGACTCTGGAATTGTCCAGTCAAGTACAGGAGAATATGTTGTTATGAC  
CACTCATTTCCACTTGAAGAGAAAGATTGGCTACTTTGTTATTCAAACATACCTGCCATGCATAATGACA  
GTGATTCTCTACAAGTCTCCTTCTGGCTCAACAGAGAGTCTGTACCAGCAAGAACTGTCTTTGGAGTAA  
CAACTGTGCTCACCATGACAACATTGAGCATCAGTGCCAGAAACTCCCTCCCTAAGGTGGCTTATGCAAC  
AGCTATGGATTGGTTTTATTGCCGTGTGCTATGCCTTTGTGTTCTCAGCTCTGATTGAGTTTGCCACAGTA  
AACTATTTCACTAAGAGAGGTTATGCATGGGATGGCAAAAGTGTGGTTCCAGAAAAGCCAAAGAAAGTAA  
AGGATCCTCTTATTAAGAAAAACAACACTTACGCTCCAACAGCAACCAGCTACACCCCTAATTTGGCCAG  
GGGCGACCCGGGCTTAGCCACCATTGCTAAAAGTGCAACCATAGAACCTAAAGAGGTCAAGCCCCGAAACA  
AAACCACCAGAACCCAAGAAAACCTTTAACAGTGTGAGCAAAATGACCGACTGTCAAGAATAGCCTTCC  
CGCTGCTATTTGGAATCTTTAACTTAGTCTACTGGGCTACGTATTTAAACAGAGAGCCTCAGCTAAAAGC  
CCCCACACCACATCAATAGATCTTTTACTCACATTCTGTTGTTTCAGTCCTCTGCACTGGGAATTTATTTA  
TGTTCTCAACGCAGTAATCCCCTCTGCTTTATTGCCTCTGTCTTAAAGAATTTGAAAGTTTCTTATTT  
TCATAATTCATTTAAGAACAAGAGACCCCTGTCTGGCAGTCTGGAGCAAAGCAGACTATGCAGCTTGGAG  
ACAGGATTCTGACAGAGCAAGCGAAAGAGCAAAGTCATGTCAGAAGGAGACAGAATGAGAGAGAAAAGAG  
GGGGAAGATGGTTCAAAGATACAAGAAAAAGTAGAAAAAATAACACTTAACTAAAACCCCTAGGTCA  
TTTGTAGATATATATTTCCAAATATTCTAAAAAGATACTGTATATGTCAAAAATATTTTTATGTGAAGG  
TGTTTCAAAGGGTAAATTATAAATGTTTCATGAAGAAAAAATTTTAAAAATCTACGTCTTTATTACACAA  
ACTATGGTGTGCTTATGTTTTGTTTTGCTTTTTAACTGATGTATAGCTTTAACATTTTTGTTTTCCAAAG  
CTGAAGATCCCCATTCTTTCTTTGAAAAAAGGCCTAAATGTCATTATTTTGTGATAAAATGCTAT

TTTAAAATTCATGGAACCTTTCATACGTAAA **GGTGCA** GTTGCTCATTGTAGAGCACATTTAGTCCAATGAA  
GATAAATGCTTTAAATAGTTTACTTCACTTTTCATCTGAGCTTTTACCCTAGACTCAAGGAAGAATAATT  
TTAACAGACATGTATACTCCATAGAACTAACTAAAATAGTTTAAAAATATTCCCTTTTTCCACCTATT  
TTCAGATAGCACATGAGCCCAACTCACTTAATTCTCATTATGAAGATGTTTTAGAGGGGCAAAAATA  
TTTTGCAAGCTCTGGAATTGTTGAATGTATTCTTTTATATAACTACATTTAAAAGCTTTAGATTGAAATTT  
ATGACTAGCAAACAAAAATAGAATATATAAACGATATATGTAAATATACAGCATGAGATTGTACATTTTT  
TACTTTTTTAAAATTGTGTTCTTAAAATATTGTGTAAGAATCACTGCCTTAGCTGTTGGAATGTTGTTA  
AATGCTATGGAATACATTTAGAACC **TGCATT** TAAGAACAGAACAGCAAGTATGAACCACATGGAACCTTA  
AAACATATGGGTGTGAAGTCCACTTATGTAGACAAACTTATAATTTCCAACTGTTGTCTAGTATACAG  
TGATCAGTTGCTCTCTGTTCAAGTCATTCCACACATTTCCCTATTTTAGGCTATTATAATATAGAAAGAA  
AATGGGAAGCATTAGTTGGAGCTAGAAAATGAACTGTATATTATTGCTATATTTGCTAATACCAACTATT  
TCAATAAGTGTGTACCATATGTAGCATTAAATATAAAAATACATAAAAAGAATGTACAGAAAATAGCTTTT  
ATTGAGTAATATTACATTTCACTTTATACTGTAGCAATATATTTGTAGGTATACTATGTAAGGGCTTTAAA  
TAAAAGAGGTCCATTAATACTTCTTATAAAAATTCTAGTCTGTTTCATTACTGCCAGATGTTTTAGAG  
ATAAATATTTATGCAGAAGGTATTTTTGAAGTCTCCTTTTGTCTGATAGAGTTAACAGATATTTAAATT  
TAGTGCTCAGAATCCACAAGTCACGGTCTAAACACACTTAGAATACTACAGCATAAATCTGTTAGCATT  
TTGCCAAATAAGACAGTTGGGATCCAAACCAAGTCTTGAGCAATGTTTTTCTCAAAAAGCTGCTATCCA  
ATGATATAGGAAAATACATTGTGTTTTCTTAAACACACTTTTCTTTTTAAATGTGCTTCATTGTTTGATT  
TGGTCTGCCTAAATTTTACAAGCTAGGCCAATGAAGGCTGAATCAAAGACATTTTCATCCACCAATATCA  
TGTGTAGATATTATGTATAGAAAATAAAAATAAATTATGGCTCTAACTTCTGTGTTGCTGTTTATCTTGTT  
ATTTTTCGGCGTTATACTAATGTGTTTATTGAGAGCATTTTACCTTCCAGACTTCTCATGGCTAACTTTT  
GGTCTGTATTTTGCTCCTTAGATGTGAATATTTCTTATTAGTCTGCTTCCTGCTACGCAATGAC **TGCATT**  
TCTATCATTTTCTCAGTTTGTAGTATATGTGGATAGTATTCTACTGTATAAATGATTGCAAAGTTTATCA  
AAAACAAATTATTATATGTAGCTTTTCTACAGTGCTTTGCTAAACCATGTAGTACTAGTTAAGTCTTCTT  
TGAAAATAAAGATACACTCTTATAGGGGACAGTTCCTGTTCACTCCCAGGAACTTTTTTAAAAGATGAC  
ACTGAATGTTTATTGCACTTTAGTGCAGTGAAGTGGCAATAAAACCTAACATGAATCAAGGTTGTTTATG  
GCAGATGCATGTGTTGCTTTACAGAGTTTAGCAAAAGCTCTTAATTTTATGTCATACTGTATTCTACTGA  
ATAATAAAGCTAACATTATTCAATAATAAATGGAA

**Supplementary Figure 9.** NCBI mRNA target analysis of miR-501-3p and miR-502-3p showed the five seed sequences binding site of both miRNAs with gamma-aminobutyric acid type A receptor subunit alpha1 gene. The seed sequence of both miRNAs is similar.

## Gene Ontology Enrichment Analysis by ShinyGO v0.61

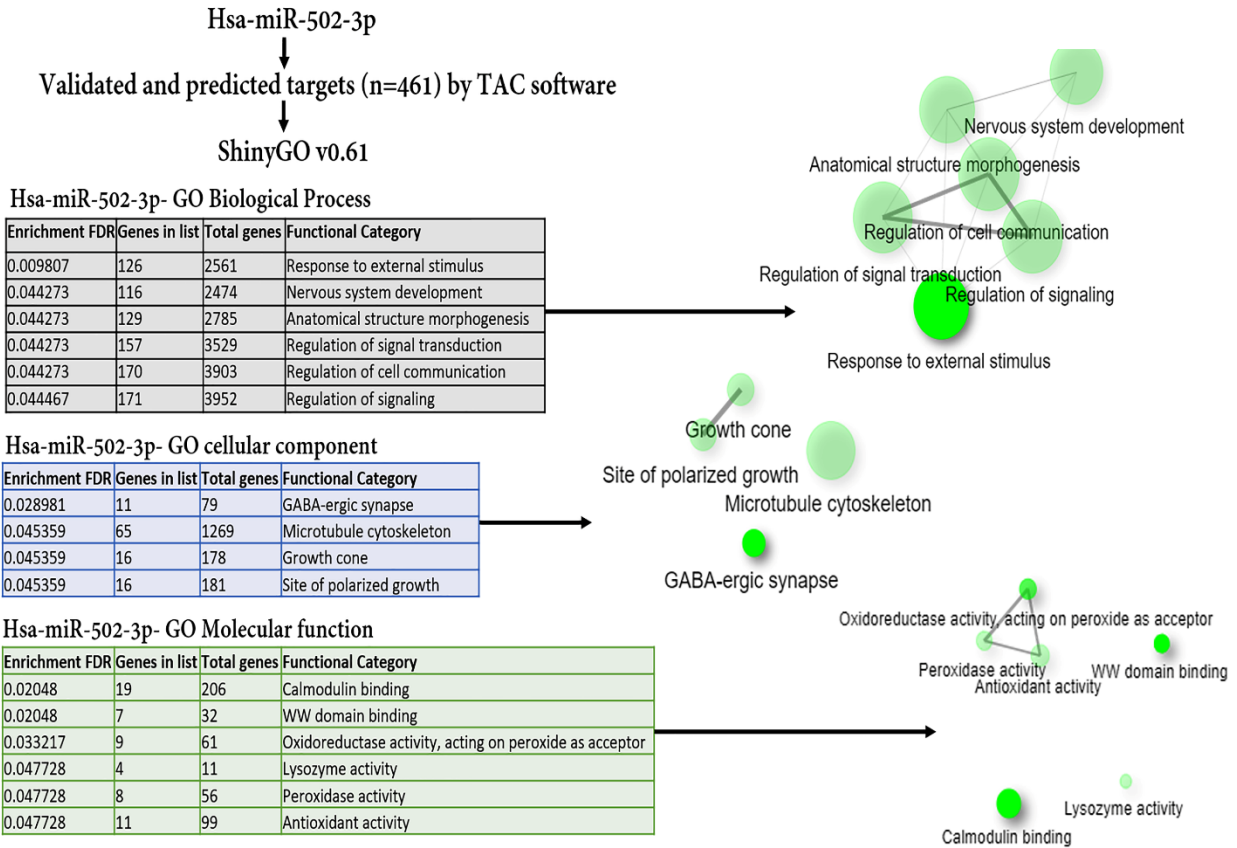

**Supplementary Figure 10.** Gene Ontology Enrichment analysis of miR-502-3p. Network shows the relationship between enriched terms provided by the ShinyGO v0.61 platform. MiR-502-3p significantly involved in several biological process, cellular components and molecular functions. Darkness of nodes coded with the level of significance of the enrichment, while node size is representative for the gene set size.

**Supplementary Table 1- Details of human postmortem brains**

| <b>1. Human Brains and Spinal Fluid Resource center, Los Angeles</b> |                    |            |            |                       |                      |                     |                            |
|----------------------------------------------------------------------|--------------------|------------|------------|-----------------------|----------------------|---------------------|----------------------------|
| <b>S. No</b>                                                         | <b>HSB#</b>        | <b>Age</b> | <b>Sex</b> | <b>Neuropathology</b> | <b>Coronal slab#</b> | <b>Structure</b>    | <b>Autolysis time (hr)</b> |
| 1                                                                    | 4513               | 74         | M          | AD                    | 1                    | Broadmann's Area 10 | 15.6                       |
| 2                                                                    | 4498               | 76         | M          | AD                    | 1                    | Broadmann's Area 10 | 12.9                       |
| 3                                                                    | 4204               | 68         | M          | AD                    | 1                    | Broadmann's Area 10 | 11.9                       |
| 4                                                                    | 4203               | 72         | F          | AD                    | 1                    | Broadmann's Area 10 | 20.3                       |
| 5                                                                    | 4454               | 82         | F          | AD                    | 1                    | Broadmann's Area 10 | 9                          |
| 6                                                                    | 4043               | 80         | F          | AD                    | 1                    | Broadmann's Area 10 | 13                         |
| 7                                                                    | 4382               | 74         | F          | AD                    | 1                    | Broadmann's Area 10 | 16.2                       |
| 8                                                                    | 4617               | 73         | F          | AD                    | 1                    | Broadmann's Area 10 | 18.9                       |
| 9                                                                    | 4718               | 93         | F          | AD                    | 1                    | Broadmann's Area 10 | 8.2                        |
| 10                                                                   | 4608               | 80         | M          | AD                    | 1                    | Broadmann's Area 10 | 3.1                        |
| 11                                                                   | 4752               | 89         | M          | AD                    | 1                    | Broadmann's Area 10 | 9                          |
| 12                                                                   | 4788               | 65         | M          | AD                    | 1                    | Broadmann's Area 10 | 7.8                        |
| 13                                                                   | 4130               | 67         | F          | Normal                | 1                    | Broadmann's Area 10 | 11.8                       |
| 14                                                                   | 4431               | 68         | F          | Normal                | 1                    | Broadmann's Area 10 | 23.7                       |
| 15                                                                   | 4660               | 73         | F          | Normal                | 1                    | Broadmann's Area 10 | 18.5                       |
| 16                                                                   | 5072               | 83         | M          | Normal                | 1                    | Broadmann's Area 10 | 19.5                       |
| 17                                                                   | 5190               | 68         | M          | Normal                | 1                    | Broadmann's Area 10 | 20.3                       |
| <b>2. Brain Endowment Bank University of Miami</b>                   |                    |            |            |                       |                      |                     |                            |
| <b>S.No.</b>                                                         | <b>Tissue code</b> | <b>Age</b> | <b>Sex</b> | <b>Brain type</b>     | <b>Race</b>          | <b>Structure</b>    | <b>Autolysis time</b>      |
| 1                                                                    | HBFR1703           | 69         | F          | AD                    | C                    | Broadmann's Area 10 | 22                         |
| 2                                                                    | HBFQ1711           | 77         | M          | AD                    | C                    | Broadmann's Area 10 | 18                         |

|    |              |    |   |         |   |                     |      |
|----|--------------|----|---|---------|---|---------------------|------|
| 3  | HBJG1710     | 79 | M | AD      | C | Broadmann's Area 10 | 23.8 |
| 4  | HBDA1704     | 80 | M | AD      | C | Broadmann's Area 10 | 22.1 |
| 5  | HCTYN1713    | 80 | F | AD      | C | Broadmann's Area 10 | 6.5  |
| 6  | HBDI1710     | 85 | F | AD      | C | Broadmann's Area 10 | 8    |
| 7  | HBEM1701     | 86 | M | AD      | C | Broadmann's Area 10 | 15.5 |
| 8  | HBIP1701     | 90 | F | AD      | C | Broadmann's Area 10 | 22.1 |
| 9  | HBCG1703     | 90 | F | AD      | C | Broadmann's Area 10 | 8.5  |
| 10 | HCTZX1702    | 95 | M | AD      | C | Broadmann's Area 10 | 19.8 |
| 11 | HCT15HAO1713 | 70 | M | Control | C | Broadmann's Area 10 | 12.7 |
| 12 | HCTZZC1711   | 82 | F | Control | C | Broadmann's Area 10 | 14.2 |
| 13 | HCT15HBC1709 | 83 | M | Control | C | Broadmann's Area 10 | 25   |
| 14 | HCTZZT1702   | 84 | M | Control | C | Broadmann's Area 10 | 15.5 |
| 15 | HCT15HBU1704 | 91 | F | Control | C | Broadmann's Area 10 | 18.7 |

### 3. Mount Sinai NIH Brain and Tissue Repository

| S. No. | Barcode | Age | Sex | DX | Race | Brain region        | PMI   |
|--------|---------|-----|-----|----|------|---------------------|-------|
| 1      | 77423   | 79  | F   | AD | W    | Broadmann's Area 10 | 6.50  |
| 2      | 77424   | 69  | M   | AD | W    | Broadmann's Area 10 | 5.42  |
| 3      | 77425   | 75  | M   | AD | W    | Broadmann's Area 10 | 8.00  |
| 4      | 77426   | 94  | F   | AD | W    | Broadmann's Area 10 | 4.33  |
| 5      | 77427   | 82  | M   | AD | W    | Broadmann's Area 10 | 20.67 |
| 6      | 77428   | 65  | M   | NL | H    | Broadmann's Area 10 | 3.83  |
| 7      | 77431   | 103 | F   | NL | W    | Broadmann's Area 10 | 3.83  |
| 8      | 77433   | 75  | M   | NL | B    | Broadmann's Area 10 | 5.00  |

|    |       |    |   |    |   |                        |      |
|----|-------|----|---|----|---|------------------------|------|
| 9  | 77436 | 93 | M | NL | W | Broadmann's<br>Area 10 | 4.17 |
| 10 | 77437 | 84 | F | NL | W | Broadmann's<br>Area 10 | 5.48 |

**Supplementary Table 2. Summary of antibody dilutions and conditions used in the immunoblotting analysis of synaptosomes**

| <b>Marker</b> | <b>Primary Antibody – Species and Dilution</b> | <b>Purchased from Company, City &amp; State</b> | <b>Secondary Antibody, Dilution</b> | <b>Purchased from Company, City &amp; State</b> |
|---------------|------------------------------------------------|-------------------------------------------------|-------------------------------------|-------------------------------------------------|
| PSD95         | Rabbit Monoclonal 1:300                        | Novus Biological, Littleton, CO                 | Donkey Anti-rabbit HRP 1:10,000     | GE Healthcare Amersham, Piscataway, NJ          |
| SNAP25        | Rabbit Polyclonal 1:500                        | Novus Biological, Littleton, CO                 | Donkey Anti-rabbit HRO 1:10,000     | GE Healthcare Amersham, Piscataway, NJ          |
| SYN           | Rabbit Polyclonal 1:500                        | Novus Biological, Littleton, CO                 | Donkey Anti-rabbit HRP 1:10,000     | GE Healthcare Amersham, Piscataway, NJ          |
| PCNA          | Mouse Monoclonal 1:500                         | Santa Cruz Biotechnology, Inc., Dallas, TX      | Sheep Anti-mouse HRP 1:10,000       | GE Healthcare Amersham, Piscataway, NJ          |
| eIF2a         | Mouse Monoclonal 1:500                         | Cell Signaling Technology, Danvers, MA          | Sheep Anti-mouse HRP 1:10,000       | GE Healthcare Amersham, Piscataway, NJ          |
| GABAR1a       | Rabbit Polyclonal 1:500                        | Bioss Antibodies, Woburn, MA                    | Donkey Anti-rabbit HRP 1:10,000     | GE Healthcare Amersham, Piscataway, NJ          |
| VGLUT1        | Rabbit Polyclonal 1:500                        | Thermo Fisher Scientific, Waltham, MA           | Donkey Anti-rabbit HRP 1:10,000     | GE Healthcare Amersham, Piscataway, NJ          |
| NueN          | Rabbit Monoclonal 1:1000                       | Abcam, Cambridge, UK                            | Donkey Anti-rabbit HRP 1:10,000     | GE Healthcare Amersham, Piscataway, NJ          |

|            |                          |                                        |                                 |                                        |
|------------|--------------------------|----------------------------------------|---------------------------------|----------------------------------------|
| IBa1/AIF-1 | Rabbit Monoclonal 1:1000 | Cell Signaling Technology, Danvers, MA | Donkey Anti-rabbit HRP 1:10,000 | GE Healthcare Amersham, Piscataway, NJ |
| AGO2       | Rabbit Monoclonal 1:500  | Cell Signaling Technology, Danvers, MA | Donkey Anti-rabbit HRP 1:10,000 | GE Healthcare Amersham, Piscataway, NJ |
| Drosha     | Rabbit Monoclonal 1:500  | Cell Signaling Technology, Danvers, MA | Donkey Anti-rabbit HRP 1:10,000 | GE Healthcare Amersham, Piscataway, NJ |
| Dicer      | Rabbit Polyclonal 1:500  | Thermo Fisher Scientific, Waltham, MA  | Donkey Anti-rabbit HRP 1:10,000 | GE Healthcare Amersham, Piscataway, NJ |
| 6E10       | Mouse Monoclonal 1:500   | Biolegend, San Diego, CA               | Sheep Anti-mouse HRP 1:10,000   | GE Healthcare Amersham, Piscataway, NJ |
| p-Tau      | Mouse Monoclonal 1:500   | Thermo Fisher Scientific, Waltham, MA  | Sheep anti-mouse HRP 1:10 000   | GE Healthcare Amersham, Piscataway, NJ |
| B-actin    | Mouse Monoclonal 1:500   | Sigma-Aldrich St Luis, MO              | Sheep anti-mouse HR 1:10,000    | GE Healthcare Amersham Piscataway, NJ  |



**Supplementary Table 3. List of selected miRNAs and forward primer sequence**

| S. No. | MiRNA name   | Forward Primer Sequences (5'-3')         |
|--------|--------------|------------------------------------------|
| 1      | miR-124-3p   | Forward primer- TAAGGCACGCGGTGAATGCCAA   |
| 2      | let-7a-5p    | Forward primer-TGAGGTAGTAGGTTGTATAGTT    |
| 3      | MiR-103a-3p  | Forward primer- AGCAGCATTGTACAGGGCTATGA  |
| 4      | miR-24-3p    | Forward primer- TGGCTCAGTTCAGCAGGAACAG   |
| 5      | miR-151a-5p  | Forward primer- TCGAGGAGCTCACAGTCTAGT    |
| 6      | miR-185-5p   | Forward primer- TGGAGAGAAAGGCAGTTCCTGA   |
| 7      | miR-140-3p   | Forward primer- TACCACAGGGTAGAACCACGG    |
| 8      | let-7d-5p    | Forward primer- AGAGGTAGTAGGTTGCATAGTT   |
| 9      | miR-138-5p   | Forward primer- AGCTGGTGTTGTGAATCAGGCCG  |
| 10     | MiR-4284     | Forward primer- GGGCTCACATCACCCCAT       |
| 11     | MiR-320a-3p  | Forward primer- AAAAGCTGGGTTGAGAGGGCGA   |
| 12     | MiR-485-5p   | Forward primer- AGAGGCTGGCCGTGATGAATTC   |
| 13     | let-7e-5p    | Forward primer- TGAGGTAGGAGGTTGTATAGTT   |
| 14     | miR-502-3p   | Forward primer- AATGCACCTGGGCAAGGATTCA   |
| 15     | miR-500a-3p  | Forward primer- ATGCACCTGGGCAAGGATTCTG   |
| 16     | miR-17-5p    | Forward primer- CAAAGTGCTTACAGTGCAGGTAG  |
| 17     | miR-379-5p   | Forward primer- TGGTAGACTATGGAACGTAGG    |
| 18     | miR-4485-3p  | Forward primer- TAACGGCCGCGGTACCCTAA     |
| 19     | miR-491-5p   | Forward primer- AGTGGGGAACCCTCCATGAGG    |
| 20     | miR-320b     | Forward primer- AAAAGCTGGGTTGAGAGGGCAA   |
| 21     | miR-320c     | Forward primer- AAAAGCTGGGTTGAGAGGGT     |
| 22     | miR-331-3p   | Forward primer- GCCCCTGGGCCTATCCTAGAA    |
| 23     | miR-501-3p   | Forward primer- AATGCACCCGGGCAAGGATTCT   |
| 24     | miR-106a-5p  | Forward primer- AAAAGTGCTTACAGTGCAGGTAG  |
| 25     | let-7c-5p    | Forward primer- TGAGGTAGTAGGTTGTATGGTT   |
| 26     | miR-6750-5p  | Forward primer- CAGGGAACAGCTGGGTGAGCTGCT |
| 27     | let-7f-5p    | Forward primer- TGAGGTAGTAGATTGTATAGTT   |
| 28     | miR-9-3p     | Forward primer- ATAAAGCTAGATAACCGAAAGT   |
| 29     | miR-5787     | Forward primer- GGGCTGGGGCGCGGGGAGGT     |
| 30     | miR-3196     | Forward primer- CGGGGCGGCAGGGGCCTC       |
| 31     | miR-3656     | Forward primer- GGCGGGTGCGGGGTGG         |
| 32     | miR-6724-5p  | Forward primer- CTGGGCCCGCGGCGGGCGTGGGG  |
| 33     | miR-4516     | Forward primer- GGGAGAAGGGTCGGGGC        |
| 34     | miR-762      | Forward primer- GGGGCTGGGGCCGGGGCCGAGC   |
| 35     | miR-8069     | Forward primer- GGATGGTTGGGGGCGGTCGGCGT  |
| 36     | miR-6821-5p  | Forward primer- GTGCGTGGTGGCTCGAGGCGGGG  |
| 37     | miR-4433b-3p | Forward primer- CAGGAGTGGGGGGTGGGACGT    |

|    |              |                                                                                    |
|----|--------------|------------------------------------------------------------------------------------|
| 38 | miR-7162-3p  | Forward primer- TCTGAGGTGGAACAGCAGC                                                |
| 39 | miR-6800-5p  | Forward primer- GTAGGTGACAGTCAGGGGCGG                                              |
| 40 | miR-4270     | Forward primer- TCAGGGAGTCAGGGGAGGGC                                               |
| 41 | miR-4459     | Forward primer- CCAGGAGGCGGAGGAGGTGGAG                                             |
| 42 | miR-6775-5p  | Forward primer- TCGGGGCATGGGGGAGGGAGGCTGG                                          |
| 43 | miR-4695-5p  | Forward primer- CAGGAGGCAGTGGGCGAGCAGG                                             |
| 44 | miR-638      | Forward primer- AGGGATCGCGGGCGGGTGGCGGCCT                                          |
| 45 | miR-4687-3p  | Forward primer- TGGCTGTTGGAGGGGGCAGGC                                              |
| 46 | miR-1915-3p  | Forward primer- CCCCAGGGCGACGCGGGCGGG                                              |
| 47 | miR-6869-5p  | Forward primer- GTGAGTAGTGGCGCGCGGGCGGC                                            |
| 48 | miR-4466     | Forward primer- GGGTGCGGGCCGGCGGGG                                                 |
| 49 | miR-2861     | Forward primer- GGGGCCTGGCGGTGGGGCGG                                               |
| 50 | miR-4488     | Forward primer- AGGGGGCGGGCTCCGGCG                                                 |
| 51 | miR-6729-5p  | Forward primer- TGGGCGAGGGCGGGCTGAGCGGC                                            |
| 52 | miR-328-5p   | Forward primer- GGGGGGGCAGGAGGGGGCTCAGGG                                           |
| 53 | miR6749-5p   | Forward primer- TCGGGCCTGGGGTTGGGGGAGC                                             |
| 54 | miR-3620-5p  | Forward primer- GTGGGCTGGGCTGGGCTGGGCC                                             |
| 55 | miR-4739     | Forward primer- AAGGGAGGAGGAGCGGAGGGGCCCT                                          |
| 56 | miR-6727-5p  | Forward primer- CTCGGGGCAGGCGGCTGGGAGCG                                            |
| 57 | miR-6125     | Forward primer- GCGGAAGGCGGAGCGGCGGA                                               |
| 58 | miR-1202     | Forward primer- GTGCCAGCTGCAGTGGGGGAG                                              |
| 59 | miR-877-5p   | Forward primer- GTAGAGGAGATGGCGCAGGG                                               |
| 60 | miR-664b-3p  | Forward primer- TTCATTTGCCTCCCAGCCTACA                                             |
| 61 | miR-6511b-5p | Forward primer- CTGCAGGCAGAAGTGGGGCTGACA                                           |
| 62 | miR-4508     | Forward primer- GCGGGGCTGGGCGCGCG                                                  |
| 63 | miR-1237-5p  | Forward primer- CGGGGGCGGGGCCGAAGCGCG                                              |
| 64 | miR-5001-5p  | Forward primer- AGGGCTGGACTCAGCGGCGGAGCT                                           |
| 65 | miR-4492     | Forward primer- GGGGCTGGGCGCGCGCC                                                  |
| 66 | miR-4497     | Forward primer- CTCCGGGACGGCTGGGC                                                  |
| 67 | miR-107      | Forward primer- AGCAGCATTGTACAGGGCTATCA                                            |
| 69 | miR-6821-5p  | Forward primer- GTGCGTGGTGGCTCGAGGCGGGG                                            |
| 71 | miR-7847-3p  | Forward primer- CGTGGAGGACGAGGAGGAGGC                                              |
| 73 | miR-6085     | Forward primer- AAGGGGCTGGGGGAGCACA                                                |
| 75 | miR-1469     | Forward primer- CTCGGCGCGGGGCGCGGGCTCC                                             |
| 77 | miR-6786-5p  | Forward primer- GCGGTGGGGCCGGAGGGGCGT                                              |
| 79 | miR-7110-5p  | Forward primer- TGGGGGTGTGGGGAGAGAGAG                                              |
| 81 | miR-4516     | Forward primer- GGGAGAAGGGTCGGGGC                                                  |
| 83 | miR-1207-5p  | Forward primer- TGGCAGGGAGGCTGGGAGGGG                                              |
| 84 | U6 SnRNA     | Forward primer- CGCTTCGGCAGCACATATACTAA<br>Reverse Primer- TATGGAACGCTTCACGAATTTGC |

|    |         |                                                                                  |
|----|---------|----------------------------------------------------------------------------------|
| 85 | Sno-202 | Forward primer- AGTACTTTTGAACCCTTTTCCA                                           |
| 86 | PSD95   | Forward primer- CTTCATCCTTGCTGGGGGTC<br>Reverse primer - TTGCGGAGGTCAACACCATT    |
| 87 | SNAP25  | Reverse primer - GTGGTCATCTGGTGGCTCTA<br>Reverse primer- TTCAGCAAACGCCACTGAGA    |
| 88 | SYN     | Forward primer- CTGCGTTAAAGGGGGGCACTA<br>Reverse primer- ACAGCCACGGTGACAAAGAA    |
| 89 | PCNA    | Forward primer- AGGGTTGGTAGTTGTCGCTG<br>Reverse primer - CAAACATGGTGGCGGAGTTG    |
| 98 | eIF1a   | Forward primer- AGGATGGGACCTTGTTTGCC<br>Reverse primer - AAAGTGCCTTCAGGAGGTCG    |
| 90 | B-actin | Forward primer- AGAAGCTGTGCTATGTTGCTCTA<br>Reverse primer- TCAGGCAGCTCATAGCTCTTC |

**Supplementary Table 4. Details of significantly deregulated miRNA candidates in unaffected controls synaptosomes vs cytosol**

| ID       | Transcript ID( Array Design) | HC Synaptosome Avg (log2) | HC Cytosol Avg (log2) | HC Synaptosome Standard Deviation | HC Cytosol Standard Deviation | Fold Change | HC Synaptosome Expression | HC Cytosol Expression | Expressed in Both Conditions | P-value | Accession    | Chromosome | Strand | Start    | Stop     |
|----------|------------------------------|---------------------------|-----------------------|-----------------------------------|-------------------------------|-------------|---------------------------|-----------------------|------------------------------|---------|--------------|------------|--------|----------|----------|
| 20500191 | hsa-miR-103a-3p              | 10.46                     | 2.55                  | 2.51                              | 3.42                          | 239.8       | T                         | T                     | T                            | 0.0099  | MIMAT0000101 | chr20      | +      | 389818   | 3898210  |
| 20500196 | hsa-miR-107                  | 9.26                      | 2.02                  | 3.24                              | 3.37                          | 151.67      | T                         | T                     | T                            | 0.0413  | MIMAT0000104 | chr10      | -      | 913525   | 91352535 |
| 20500787 | hsa-miR-185-5p               | 8.58                      | 1.41                  | 1.49                              | 1.89                          | 144.25      | T                         | F                     | F                            | 0.0003  | MIMAT0000455 | chr22      | +      | 20020676 | 20020697 |
| 20500743 | hsa-miR-138-5p               | 7.89                      | 1.28                  | 3.48                              | 2.46                          | 97.77       | T                         | F                     | F                            | 0.0424  | MIMAT0000430 | chr16      | +      | 56892439 | 56892461 |
| 20518879 | hsa-miR-4485                 | 7.67                      | 1.24                  | 1.31                              | 2.25                          | 86.21       | T                         | F                     | F                            | 0.0009  | MIMAT0019019 | chr11      | -      | 10529824 | 10529843 |
| 20500713 | hsa-let-7g-5p                | 6.63                      | 1.51                  | 3.04                              | 0.76                          | 34.89       | T                         | F                     | F                            | 0.0492  | MIMAT0000414 | chr3       | -      | 52302352 | 52302373 |

|          |                 |      |      |      |      |       |   |   |   |          |               |       |   |          |          |
|----------|-----------------|------|------|------|------|-------|---|---|---|----------|---------------|-------|---|----------|----------|
| 20500148 | hsa-miR-24-3p   | 9.1  | 4.5  | 1.2  | 2.44 | 24.29 | T | T | T | 0.0013   | MIM AT0000080 | chr19 | - | 13947103 | 13947124 |
| 20517744 | hsa-miR-4284    | 6.18 | 1.72 | 1.6  | 0.37 | 22    | T | F | F | 0.0002   | MIM AT0016915 | chr7  | + | 73125657 | 73125674 |
| 20500123 | hsa-let-7f-5p   | 5.52 | 1.52 | 3.18 | 0.25 | 16.06 | T | T | T | 0.0296   | MIM AT0000067 | chr9  | + | 96938635 | 96938656 |
| 20500764 | hsa-miR-9-3p    | 4.86 | 1.36 | 2.1  | 0.23 | 11.33 | T | F | F | 0.028    | MIM AT0000442 | chr1  | - | 1.56E+08 | 1.56E+08 |
| 20503876 | hsa-miR-500a-3p | 4.83 | 1.52 | 1.29 | 0.22 | 9.93  | T | F | F | 0.0011   | MIM AT0002871 | chrX  | + | 49773090 | 49773111 |
| 20500121 | hsa-let-7e-5p   | 11.4 | 8.19 | 1.43 | 1.69 | 9.26  | T | T | T | 0.0082   | MIM AT0000066 | chr19 | + | 52196046 | 52196067 |
| 20503880 | hsa-miR-502-3p  | 4.75 | 1.59 | 0.76 | 0.39 | 8.96  | T | F | F | 1.15E-05 | MIM AT0004775 | chrX  | + | 49779257 | 49779278 |
| 20504562 | hsa-miR-320b    | 9.76 | 7.19 | 0.68 | 1.64 | 5.96  | T | T | T | 0.0061   | MIM AT0005792 | chr1  | + | 1.17E+08 | 1.17E+08 |
| 20500848 | hsa-mi          | 9.95 | 7.49 | 0.56 | 1.71 | 5.51  | T | T | T | 0.0055   | MIM AT0000510 | chr8  | - | 22102488 | 22102509 |

|          |                |       |      |      |      |      |   |   |   |        |              |       |   |          |          |
|----------|----------------|-------|------|------|------|------|---|---|---|--------|--------------|-------|---|----------|----------|
|          | R-320a         |       |      |      |      |      |   |   |   |        |              |       |   |          |          |
| 20500112 | hsa-let-7a-5p  | 10.6  | 8.29 | 2.14 | 2.15 | 4.97 | T | T | T | 0.0465 | MIMAT0000062 | chr11 | - | 1.22E+08 | 1.22E+08 |
| 20500119 | hsa-let-7d-5p  | 10.47 | 8.18 | 1.83 | 0.93 | 4.91 | T | T | T | 0.0158 | MIMAT0000065 | chr9  | + | 96941123 | 96941144 |
| 20500729 | hsa-miR-124-3p | 10.95 | 8.84 | 1.41 | 3.27 | 4.32 | T | T | T | 0.0062 | MIMAT0000422 | chr20 | + | 61809904 | 61809923 |
| 20504563 | hsa-miR-320c   | 9.32  | 7.28 | 0.48 | 1.2  | 4.11 | T | T | T | 0.0032 | MIMAT0005793 | chr18 | + | 19263520 | 19263539 |
| 20500117 | hsa-let-7c-5p  | 11.63 | 9.86 | 1.62 | 0.66 | 3.39 | T | T | T | 0.0128 | MIMAT0000064 | chr21 | + | 17912158 | 17912179 |
| 20534575 | hsa-mir-124-1  | 10.66 | 8.94 | 1.36 | 3.26 | 3.28 | T | T | T | 0.0143 | MI0000443    | chr8  | - | 9760898  | 9760982  |
| 20534578 | hsa-mir-124-2  | 10.66 | 8.94 | 1.36 | 3.26 | 3.28 | T | T | T | 0.0143 | MI0000444    | chr8  | + | 65291706 | 65291814 |
| 20534580 | hsa-mir-124-3  | 10.66 | 8.94 | 1.36 | 3.26 | 3.28 | T | T | T | 0.0143 | MI0000445    | chr20 | + | 61809852 | 61809938 |

|          |                 |      |       |      |      |       |   |   |   |        |              |       |   |          |          |
|----------|-----------------|------|-------|------|------|-------|---|---|---|--------|--------------|-------|---|----------|----------|
| 20518913 | hsa-miR-4516    | 8.46 | 9.46  | 0.68 | 0.46 | -2.01 | T | T | T | 0.0054 | MIMAT0019053 | chr16 | + | 2183121  | 2183137  |
| 20525420 | hsa-miR-6729-5p | 9.02 | 10.04 | 0.53 | 0.67 | -2.02 | T | T | T | 0.0079 | MIMAT0027359 | chr1  | + | 12089220 | 12089241 |
| 20526178 | hsa-miR-7110-5p | 1.58 | 2.65  | 0.39 | 0.91 | -2.09 | T | T | T | 0.0384 | MIMAT0028117 | chr3  | + | 1.23E+08 | 1.23E+08 |
| 20514163 | hsa-miR-2861    | 7.65 | 8.79  | 0.8  | 0.27 | -2.2  | T | T | T | 0.0093 | MIMAT0013802 | chr9  | + | 1.31E+08 | 1.31E+08 |
| 20525533 | hsa-miR-6786-5p | 7.32 | 8.48  | 1.06 | 0.65 | -2.23 | T | T | T | 0.0239 | MIMAT0027472 | chr17 | + | 79660839 | 79660859 |
| 20518882 | hsa-miR-4488    | 8.4  | 9.57  | 0.55 | 0.41 | -2.24 | T | T | T | 0.0123 | MIMAT0019022 | chr11 | + | 61276071 | 61276088 |
| 20518851 | hsa-miR-4466    | 8.2  | 9.36  | 1.63 | 0.81 | -2.25 | T | T | T | 0.0399 | MIMAT0018993 | chr6  | - | 1.57E+08 | 1.57E+08 |
| 20506801 | hsa-miR-120     | 5.56 | 6.74  | 1.19 | 0.74 | -2.27 | T | T | T | 0.0105 | MIMAT0005871 | chr8  | + | 1.29E+08 | 1.29E+08 |

|          |                 |      |      |      |      |       |   |   |   |        |              |       |   |          |          |
|----------|-----------------|------|------|------|------|-------|---|---|---|--------|--------------|-------|---|----------|----------|
|          | 7-5p            |      |      |      |      |       |   |   |   |        |              |       |   |          |          |
| 20537543 | hsa-mir-6800    | 6.07 | 7.26 | 0.49 | 0.82 | -2.27 | T | T | T | 0.0113 | MI0022645    | chr19 | + | 50335275 | 50335356 |
| 20537544 | hsa-mir-6800    | 6.12 | 7.35 | 0.48 | 0.91 | -2.33 | T | T | T | 0.0129 | MI0022645    | chr19 | + | 50335275 | 50335356 |
| 20507742 | hsa-miR-1469    | 6.27 | 7.52 | 0.89 | 0.93 | -2.38 | T | T | T | 0.0289 | MIMAT0007347 | chr15 | + | 96876490 | 96876511 |
| 20517907 | hsa-miR-3656    | 7.5  | 8.88 | 0.37 | 0.63 | -2.61 | T | T | T | 0.0024 | MIMAT0018076 | chr11 | + | 1.19E+08 | 1.19E+08 |
| 20509237 | hsa-miR-1915-3p | 7.78 | 9.21 | 1.96 | 1.17 | -2.7  | T | T | T | 0.0499 | MIMAT0007892 | chr10 | - | 21785505 | 21785524 |
| 20504391 | hsa-miR-638     | 7.94 | 9.41 | 0.81 | 0.82 | -2.77 | T | T | T | 0.0138 | MIMAT0003308 | chr19 | + | 10829095 | 10829119 |
| 20519493 | hsa-miR-4687-3p | 7.8  | 9.28 | 0.69 | 0.27 | -2.78 | T | T | T | 0.0009 | MIMAT0019775 | chr11 | + | 3877343  | 3877363  |
| 20525511 | hsa-miR-677     | 5.89 | 7.48 | 0.99 | 1.08 | -3.03 | T | T | T | 0.036  | MIMAT0027450 | chr16 | - | 87868237 | 87868261 |



|                  |                                          |      |          |      |          |               |   |   |   |                |                      |           |   |                  |                  |
|------------------|------------------------------------------|------|----------|------|----------|---------------|---|---|---|----------------|----------------------|-----------|---|------------------|------------------|
|                  | 5-5p                                     |      |          |      |          |               |   |   |   |                |                      |           |   |                  |                  |
| 205<br>253<br>96 | hsa<br>-<br>mi<br>R-<br>672<br>4-<br>5p  | 7.16 | 8.<br>87 | 0.89 | 0.2<br>8 | -<br>3.<br>26 | T | T | T | 0.<br>00<br>06 | MIMAT0025<br>856     |           |   |                  |                  |
| 205<br>188<br>39 | hsa<br>-<br>mi<br>R-<br>445<br>9         | 3.79 | 5.<br>6  | 1.3  | 1.1<br>7 | -<br>3.<br>51 | T | T | T | 0.<br>01<br>2  | MIM<br>AT00<br>18981 | chr5      | - | 533<br>713<br>90 | 533<br>714<br>11 |
| 205<br>255<br>61 | hsa<br>-<br>mi<br>R-<br>680<br>0-<br>5p  | 6.58 | 8.<br>51 | 0.75 | 0.5<br>4 | -<br>3.<br>81 | T | T | T | 0.<br>00<br>18 | MIM<br>AT00<br>27500 | chr1<br>9 | + | 503<br>352<br>79 | 503<br>352<br>99 |
| 205<br>177<br>29 | hsa<br>-<br>mi<br>R-<br>427<br>0         | 4.79 | 6.<br>79 | 1.5  | 0.3<br>8 | -<br>4.<br>01 | T | T | T | 0.<br>00<br>59 | MIM<br>AT00<br>16900 | chr3      | - | 155<br>377<br>86 | 155<br>378<br>05 |
| 205<br>230<br>17 | hsa<br>-<br>mi<br>R-<br>608<br>5         | 4.2  | 6.<br>3  | 1.83 | 0.7<br>2 | -<br>4.<br>31 | T | T | T | 0.<br>03<br>09 | MIM<br>AT00<br>23710 | chr1<br>5 | + | 626<br>353<br>10 | 626<br>353<br>28 |
| 205<br>291<br>31 | hsa<br>-<br>mi<br>R-<br>443<br>3b-<br>3p | 3.5  | 5.<br>65 | 1.43 | 0.4<br>6 | -<br>4.<br>45 | T | T | T | 0.<br>00<br>42 | MIM<br>AT00<br>30414 | chr2      | - | 645<br>679<br>03 | 645<br>679<br>23 |
| 205<br>195<br>07 | hsa<br>-<br>mi<br>R-<br>469<br>5-<br>5p  | 3.48 | 5.<br>63 | 0.97 | 0.6<br>1 | -<br>4.<br>46 | T | T | T | 0.<br>00<br>09 | MIM<br>AT00<br>19788 | chr1      | - | 192<br>097<br>44 | 192<br>097<br>65 |

|                  |                                         |      |          |      |          |               |   |   |   |                |                      |           |   |                  |                  |
|------------------|-----------------------------------------|------|----------|------|----------|---------------|---|---|---|----------------|----------------------|-----------|---|------------------|------------------|
| 205<br>291<br>39 | hsa<br>-<br>mi<br>R-<br>784<br>7-<br>3p | 4.78 | 7.<br>37 | 1.92 | 1.2<br>9 | -<br>6.<br>02 | T | T | T | 0.<br>03<br>59 | MIM<br>AT00<br>30422 | chr1<br>1 | + | 190<br>133<br>5  | 190<br>135<br>5  |
| 205<br>256<br>03 | hsa<br>-<br>mi<br>R-<br>682<br>1-<br>5p | 3.87 | 6.<br>9  | 1.64 | 1.7<br>6 | -<br>8.<br>17 | T | T | T | 0.<br>04<br>94 | MIM<br>AT00<br>27542 | chr2<br>2 | + | 503<br>565<br>14 | 503<br>565<br>36 |

**Supplementary Table 5. Details of significantly deregulated miRNA candidates in AD synaptosomes vs cytosol**

| ID       | Transcript ID(Array Design) | AD Synaptosome Avg (log2) | AD Cytosol Avg (log2) | AD Synaptosome Standard Deviation | AD Cytosol Standard Deviation | Fold Change | P-value | AD Synaptosome Expressed | AD Cytosol Expressed | Expressed in Both Conditions | Accession    | Chromosome | Strand | Start    | Stop     |
|----------|-----------------------------|---------------------------|-----------------------|-----------------------------------|-------------------------------|-------------|---------|--------------------------|----------------------|------------------------------|--------------|------------|--------|----------|----------|
| 20500729 | hsa-miR-124-3p              | 10.45                     | 1.95                  | 0.8                               | 3.67                          | 361.92      | 0.0018  | T                        | T                    | T                            | MIMAT0000422 | chr20      | +      | 61809904 | 61809923 |
| 20500112 | hsa-let-7a-5p               | 10.23                     | 2.07                  | 2.4                               | 3.55                          | 284.64      | 0.0096  | T                        | T                    | T                            | MIMAT0000062 | chr11      | -      | 1.22E+08 | 1.22E+08 |
| 20534575 | hsa-mir-124-1               | 10.03                     | 2.17                  | 0.77                              | 3.39                          | 233.1       | 0.002   | T                        | T                    | T                            | MI0000443    | chr8       | -      | 9760898  | 9760982  |
| 20534578 | hsa-mir-124-2               | 10.03                     | 2.17                  | 0.77                              | 3.39                          | 233.1       | 0.002   | T                        | T                    | T                            | MI0000444    | chr8       | +      | 65291706 | 65291814 |
| 20534580 | hsa-mir-124-3               | 10.03                     | 2.17                  | 0.77                              | 3.39                          | 233.1       | 0.002   | T                        | T                    | T                            | MI0000445    | chr20      | +      | 61809852 | 61809938 |
| 20500148 | hsa-miR-24-3p               | 9.09                      | 1.25                  | 0.57                              | 2.95                          | 229.12      | 0.007   | T                        | F                    | F                            | MIMAT0000080 | chr19      | -      | 13947103 | 13947124 |
| 20500787 | hsa-miR-185-5p              | 7.87                      | 1.04                  | 2.82                              | 1.75                          | 113.71      | 0.0071  | T                        | F                    | F                            | MIMAT0000455 | chr22      | +      | 20020676 | 20020697 |
| 20501286 | hsa-miR-151a-5p             | 8.2                       | 1.39                  | 1.74                              | 3.45                          | 112.19      | 0.0181  | T                        | T                    | T                            | MIMAT0000697 | chr8       | -      | 1.42E+08 | 1.42E+08 |
| 20500191 | hsa-miR-103a-3p             | 9.96                      | 3.16                  | 2.21                              | 3.76                          | 111.16      | 0.0078  | T                        | T                    | T                            | MIMAT0000101 | chr20      | +      | 3898188  | 3898210  |

|          |                 |       |      |      |      |       |          |   |   |   |              |       |   |          |          |
|----------|-----------------|-------|------|------|------|-------|----------|---|---|---|--------------|-------|---|----------|----------|
| 20500119 | hsa-let-7d-5p   | 9.83  | 3.23 | 2.05 | 3.27 | 97.29 | 0.0081   | T | T | T | MIMAT0000065 | chr9  | + | 96941123 | 96941144 |
| 20500848 | hsa-miR-320a    | 9.93  | 3.7  | 1.27 | 3.74 | 74.66 | 0.01     | T | T | T | MIMAT0000510 | chr8  | - | 22102488 | 22102509 |
| 20500746 | hsa-miR-140-3p  | 7.34  | 1.24 | 1.21 | 2.54 | 68.94 | 0.0048   | T | F | F | MIMAT0004597 | chr16 | + | 69967045 | 69967065 |
| 20500743 | hsa-miR-138-5p  | 7     | 1.25 | 2.93 | 2.23 | 53.64 | 0.0261   | T | F | F | MIMAT0000430 | chr16 | + | 56892439 | 56892461 |
| 20500121 | hsa-let-7e-5p   | 10.52 | 5.02 | 1.2  | 3.22 | 45.32 | 0.0025   | T | T | T | MIMAT0000066 | chr19 | + | 52196046 | 52196067 |
| 20503103 | hsa-miR-485-5p  | 6.81  | 1.31 | 1.88 | 2.13 | 45.03 | 0.0156   | T | T | T | MIMAT0002175 | chr14 | + | 1.02E+08 | 1.02E+08 |
| 20517744 | hsa-miR-4284    | 6.67  | 1.18 | 1.93 | 0.23 | 44.86 | 0.0001   | T | F | F | MIMAT0016915 | chr7  | + | 73125657 | 73125674 |
| 20500130 | hsa-miR-17-5p   | 6.39  | 1.14 | 2.44 | 0.8  | 37.97 | 0.0132   | T | F | F | MIMAT0000070 | chr13 | + | 92002872 | 92002894 |
| 20503880 | hsa-miR-502-3p  | 6.88  | 1.95 | 1.73 | 0.94 | 30.51 | 0.0001   | T | T | T | MIMAT0004775 | chrX  | + | 49779257 | 49779278 |
| 20503876 | hsa-miR-500a-3p | 6.27  | 1.41 | 1.47 | 0.52 | 28.99 | 1.62E-05 | T | F | F | MIMAT0002871 | chrX  | + | 49773090 | 49773111 |
| 20504562 | hsa-miR-320b    | 9.56  | 4.93 | 1.19 | 3.58 | 24.76 | 0.011    | T | T | T | MIMAT0005792 | chr1  | + | 1.17E+08 | 1.17E+08 |
| 20503789 | hsa-miR-        | 5.63  | 1.02 | 1.95 | 2.12 | 24.53 | 0.036    | T | F | F | MIMAT0002807 | chr9  | + | 20716119 | 20716140 |

|          |                 |      |      |      |      |       |        |   |   |   |              |       |   |          |          |
|----------|-----------------|------|------|------|------|-------|--------|---|---|---|--------------|-------|---|----------|----------|
|          | 491-5p          |      |      |      |      |       |        |   |   |   |              |       |   |          |          |
| 20504563 | hsa-miR-320c    | 9.41 | 5.2  | 1.43 | 3.38 | 18.47 | 0.0259 | T | T | T | MIMAT0005793 | chr18 | + | 19263520 | 19263539 |
| 20501244 | hsa-miR-379-5p  | 5.37 | 1.32 | 2.1  | 0.82 | 16.55 | 0.0052 | T | F | F | MIMAT0000733 | chr14 | + | 1.01E+08 | 1.01E+08 |
| 20518879 | hsa-miR-4485    | 5.98 | 2.17 | 1.13 | 1.74 | 13.99 | 0.0009 | T | T | T | MIMAT0019019 | chr11 | - | 10529824 | 10529843 |
| 20501293 | hsa-miR-331-3p  | 4.77 | 1.05 | 1.4  | 1.68 | 13.16 | 0.0176 | T | F | F | MIMAT0000760 | chr12 | + | 95702256 | 95702276 |
| 20503878 | hsa-miR-501-3p  | 4.29 | 1.09 | 1    | 1.02 | 9.22  | 0.004  | T | F | F | MIMAT0004774 | chrX  | + | 49774380 | 49774401 |
| 20500194 | hsa-miR-106a-5p | 4.43 | 1.33 | 1.99 | 0.7  | 8.57  | 0.0101 | T | F | F | MIMAT0000103 | chrX  | - | 1.33E+08 | 1.33E+08 |
| 20529779 | hsa-miR-8069    | 7.2  | 8.3  | 0.75 | 0.31 | -2.14 | 0.0052 | T | T | T | MIMAT0030996 | chr21 | + | 15096563 | 15096585 |
| 20525699 | hsa-miR-6869-5p | 7.07 | 8.2  | 0.29 | 0.55 | -2.18 | 0.0025 | T | T | T | MIMAT0027638 | chr20 | - | 1373584  | 1373605  |
| 20525603 | hsa-miR-6821-5p | 3.76 | 5.02 | 1.05 | 0.51 | -2.4  | 0.0112 | T | T | T | MIMAT0027542 | chr22 | + | 50356514 | 50356536 |
| 20518913 | hsa-miR-4516    | 7.29 | 8.61 | 0.69 | 0.44 | -2.5  | 0.0024 | T | T | T | MIMAT0019053 | chr16 | + | 2183121  | 2183137  |
| 20517907 | hsa-miR-        | 6.35 | 7.69 | 0.78 | 0.92 | -2.53 | 0.0346 | T | T | T | MIMAT0018076 | chr11 | + | 1.19E+08 | 1.19E+08 |

|                  |                                 |      |          |      |          |               |                |   |   |   |                      |       |   |                  |                  |
|------------------|---------------------------------|------|----------|------|----------|---------------|----------------|---|---|---|----------------------|-------|---|------------------|------------------|
|                  | 365<br>6                        |      |          |      |          |               |                |   |   |   |                      |       |   |                  |                  |
| 205<br>045<br>86 | hsa-<br>miR<br>-762             | 6.61 | 7.9<br>8 | 0.54 | 0.3<br>1 | -<br>2.5<br>9 | 0.<br>00<br>06 | T | T | T | MIMA<br>T0010<br>313 | chr16 | + | 309<br>052<br>72 | 309<br>052<br>93 |
| 205<br>156<br>38 | hsa-<br>miR<br>-<br>319<br>6    | 7.53 | 9.0<br>6 | 0.5  | 0.3<br>4 | -<br>2.8<br>9 | 0.<br>00<br>02 | T | T | T | MIMA<br>T0015<br>080 | chr20 | + | 618<br>701<br>40 | 618<br>701<br>57 |
| 205<br>225<br>37 | hsa-<br>miR<br>-<br>578<br>7    | 7.32 | 8.9<br>8 | 0.73 | 0.7<br>7 | -<br>3.1<br>5 | 0.<br>03<br>1  | T | T | T | MIMA<br>T0023<br>252 | chr3  | + | 502<br>648<br>70 | 502<br>648<br>89 |
| 205<br>196<br>36 | hsa-<br>miR<br>-<br>476<br>3-3p | 4.17 | 5.9<br>6 | 1.38 | 1.1<br>6 | -<br>3.4<br>5 | 0.<br>04<br>95 | T | T | T | MIMA<br>T0019<br>913 | chr22 | + | 465<br>095<br>04 | 465<br>095<br>27 |
| 205<br>201<br>98 | hsa-<br>miR<br>-<br>500<br>1-5p | 2.43 | 4.3<br>9 | 0.85 | 1.0<br>6 | -<br>3.8<br>8 | 0.<br>04<br>25 | T | T | T | MIMA<br>T0021<br>021 | chr2  | - | 2.3<br>3E+<br>08 | 2.3<br>3E+<br>08 |

**Supplementary Table 6. Details of significantly deregulated miRNA candidates in cytosol in AD vs UC**

| Transcript ID(Array Design) | AD Cytosol Avg (log2) | HC Cytosol Avg (log2) | AD Cytosol Standard Deviation | HC Cytosol Standard Deviation | Fold Change | P-val  | AD Cytosol Expressed | HC Cytosol Expressed | Expressed in Both Conditions | Accession    | Chromosome | Strand | Start    | Stop     |
|-----------------------------|-----------------------|-----------------------|-------------------------------|-------------------------------|-------------|--------|----------------------|----------------------|------------------------------|--------------|------------|--------|----------|----------|
| hsa-miR-1915-3p             | 6.16                  | 8.92                  | 1.68                          | 1.13                          | -6.79       | 0.0049 | T                    | T                    | T                            | MIMAT0007892 | chr10      | -      | 21785505 | 21785524 |
| hsa-miR-328-5p              | 4.46                  | 6.94                  | 2                             | 0.46                          | -5.61       | 0.0015 | T                    | T                    | T                            | MIMAT0026486 | chr16      | -      | 67236270 | 67236292 |
| hsa-miR-7162-3p             | 1.57                  | 3.78                  | 0.44                          | 2.01                          | -4.62       | 0.0222 | T                    | T                    | T                            | MIMAT0028235 | chr10      | -      | 30657526 | 30657544 |
| hsa-miR-6749-5p             | 2.98                  | 5.16                  | 1.57                          | 0.75                          | -4.53       | 0.0208 | T                    | T                    | T                            | MIMAT0027398 | chr11      | -      | 64669901 | 64669922 |
| hsa-miR-3620-5p             | 3.85                  | 5.66                  | 1.74                          | 1.17                          | -3.5        | 0.0169 | T                    | T                    | T                            | MIMAT0022967 | chr1       | +      | 2.28E+08 | 2.28E+08 |
| hsa-miR-638                 | 7.73                  | 9.15                  | 1.63                          | 0.83                          | -2.66       | 0.0155 | T                    | T                    | T                            | MIMAT0003308 | chr19      | +      | 10829095 | 10829119 |
| hsa-miR-4739                | 5.89                  | 7.3                   | 1.62                          | 0.93                          | -2.66       | 0.0152 | T                    | T                    | T                            | MIMAT0019868 | chr17      | -      | 77681025 | 77681049 |
| hsa-miR-4695-5p             | 3.37                  | 4.66                  | 1.14                          | 0.5                           | -2.45       | 0.0179 | T                    | T                    | T                            | MIMAT0019788 | chr1       | -      | 19209744 | 19209765 |
| hsa-miR-6727-5p             | 7.72                  | 8.98                  | 0.72                          | 0.71                          | -2.41       | 0.0154 | T                    | T                    | T                            | MIMAT0027355 | chr1       | -      | 1247919  | 1247941  |
| hsa-miR-6800-5p             | 6.92                  | 8.16                  | 0.65                          | 0.47                          | -2.36       | 0.0012 | T                    | T                    | T                            | MIMAT0027500 | chr19      | +      | 50335279 | 50335299 |
| hsa-miR-6125                | 8.4                   | 9.6                   | 0.32                          | 0.54                          | -2.3        | 0.0029 | T                    | T                    | T                            | MIMAT0024598 | chr12      | +      | 62654199 | 62654218 |
| hsa-miR-1202                | 1.61                  | 2.68                  | 0.27                          | 1.24                          | -2.1        | 0.0226 | T                    | T                    | T                            | MIMAT0005865 | chr6       | +      | 1.56E+08 | 1.56E+08 |
| hsa-miR-6729-5p             | 8.72                  | 9.73                  | 0.44                          | 0.66                          | -2.02       | 0.003  | T                    | T                    | T                            | MIMAT0027359 | chr1       | +      | 12089220 | 12089241 |

**Supplementary Table 7. Details of significantly deregulated miRNA candidates in synaptosomes in AD vs UC**

| Transcript ID (Array Design) | AD Synaptosome Avg (log2) | HC Synaptosome Avg (log2) | AD Synaptosome Standard Deviation | HC Synaptosome Standard Deviation | Fold Change | P-val  | AD Synaptosome Expressed | HC Synaptosome Expressed | Expressed in Both Conditions | Accession    | Chromosome | Strand | Start    | Stop     |
|------------------------------|---------------------------|---------------------------|-----------------------------------|-----------------------------------|-------------|--------|--------------------------|--------------------------|------------------------------|--------------|------------|--------|----------|----------|
| hsa-miR-502-3p               | 7.86                      | 4.65                      | 1.88                              | 0.79                              | 9.23        | 0.007  | T                        | T                        | T                            | MIMAT0004775 | chrX       | +      | 49779257 | 49779278 |
| hsa-miR-500a-3p              | 6.99                      | 4.87                      | 1.5                               | 1.26                              | 4.33        | 0.0035 | T                        | T                        | T                            | MIMAT0002871 | chrX       | +      | 49773090 | 49773111 |
| hsa-miR-877-5p               | 5.69                      | 4.34                      | 1.3                               | 0.68                              | 2.55        | 0.0218 | T                        | T                        | T                            | MIMAT0004949 | chr6       | +      | 30552109 | 30552128 |
| hsa-miR-664b-3p              | 2.63                      | 1.57                      | 1.26                              | 0.39                              | 2.09        | 0.0386 | T                        | T                        | T                            | MIMAT0022272 | chrX       | +      | 1.54E+08 | 1.54E+08 |
| hsa-miR-3196                 | 8.25                      | 9.27                      | 0.52                              | 0.64                              | -2.04       | 0.0363 | T                        | T                        | T                            | MIMAT0015080 | chr20      | +      | 61870140 | 61870157 |
| hsa-miR-6511b-5p             | 1.53                      | 2.6                       | 0.54                              | 0.95                              | -2.09       | 0.0173 | T                        | T                        | T                            | MIMAT0025847 | chr16      | -      | 2156721  | 2156744  |
| hsa-miR-4508                 | 7.17                      | 8.71                      | 1.73                              | 1.1                               | -2.91       | 0.0245 | T                        | T                        | T                            | MIMAT0019045 | chr15      | -      | 23807254 | 23807270 |
| hsa-miR-1237-5p              | 5.61                      | 7.34                      | 1.88                              | 0.24                              | -3.31       | 0.0231 | T                        | T                        | T                            | MIMAT0022946 | chr11      | +      | 64136123 | 64136143 |
| hsa-miR-5001-5p              | 1.82                      | 3.88                      | 0.72                              | 1.94                              | -4.16       | 0.0495 | T                        | T                        | T                            | MIMAT0021021 | chr2       | -      | 2.33E+08 | 2.33E+08 |
| hsa-miR-4492                 | 1.63                      | 4.56                      | 0.92                              | 1.62                              | -7.61       | 0.0089 | F                        | T                        | F                            | MIMAT0019027 | chr11      | +      | 1.19E+08 | 1.19E+08 |
| hsa-miR-4497                 | 1.79                      | 6.05                      | 2.47                              | 0.88                              | -19.16      | 0.048  | T                        | T                        | T                            | MIMAT0019032 | chr12      | +      | 1.1E+08  | 1.1E+08  |

**Supplementary Data 1.** Ingenuity Pathway analysis of synaptosomal and cytosolic miRNAs in UC

**Supplementary Data 2.** Ingenuity Pathway analysis of synaptosomal and cytosolic miRNAs in AD.

**Supplementary Data 3.** Ingenuity Pathway analysis of cytosolic miRNAs in AD vs UC.

**Supplementary Data 4.** Ingenuity Pathway analysis of synaptosomal and cytosolic miRNAs in AD vs UC.
